# Supplementary material for: miR-93-5p regulates the occurrence and development of esophageal carcinoma epithelial cells by targeting TGFβR2
Source: PubMed Central journal article supplement — Int J Mol Med. 2020 Dec 29;47(3):3. doi: 10.3892/ijmm.2020.4836 (PMC7834964; doi:10.3892/ijmm.2020.4836), 2020-12-29

Figure S1. HR of HF model rats. HR of HF model rats was measured. Three independent repeated tests were conducted. The data were expressed as the mean  $\pm$  standard deviation and analyzed using one-way or two-way ANOVA followed by Tukey's multiple comparison test. HR, heart rate; HF, heart failure.

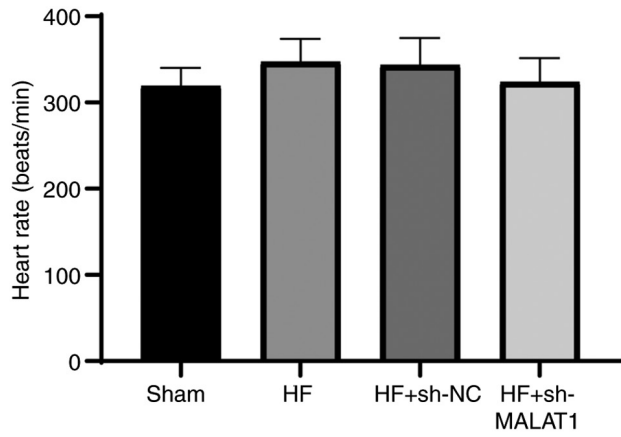

Supplement: Supplementary_Data.pdf [file Supplementary_Data.pdf]
